# Supplementary material for: A Selection Flowchart for Micromodel Experiments Based on Computational Fluid Dynamic Simulations of Surfactant Flooding in Enhanced Oil Recovery
Source: MDPI journal article supplement (doi:10.3390/pr9111887), 2021-10-22
Supplement: s1 [file s1]

Supplementary Information

# A Selection Flowchart for Micromodel Experiments based on Computational Fluid Dynamic Simulations of Surfactant Flooding in Enhanced Oil Recovery

Santiago Céspedes <sup>1,2</sup>, Alejandro Molina <sup>2</sup>, Betiana Lerner <sup>3,4</sup>, Maximiliano S. Pérez <sup>3,4</sup>, Camilo A. Franco <sup>1</sup> and Farid B. Cortés<sup>1,\*</sup>

**Citation:** Céspedes, S.; Molina, A.; Lerner, B.; Pérez, M.S.; Franco, C.A. A Selection Flowchart for Micromodel Experiments based on Computational Fluid Dynamic Simulations of Surfactant Flooding in Enhanced Oil Recovery. *Processes* **2021**, *9*, 1887. <https://doi.org/10.3390/pr9111887>

Academic Editor: Alfredo Iranzo

Received: 21 September 2021

Accepted: 8 October 2021

Published: 22 October 2021

**Publisher's Note:** MDPI stays neutral with regard to jurisdictional claims in published maps and institutional affiliations.

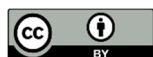

**Copyright:** © 2021 by the authors. Licensee MDPI, Basel, Switzerland. This article is an open access article distributed under the terms and conditions of the Creative Commons Attribution (CC BY) license (<https://creativecommons.org/licenses/by/4.0/>).

<sup>1</sup> Grupo de Investigación en Fenómenos de Superficie-Michael Polanyi, Department of Processes and Energy, Faculty of Mines, National University of Colombia, Medellín 050034, Colombia; sacespedeszu@unal.edu.co (S.C.); caafrancoar@unal.edu.co (C.A.F.); fbcortes@unal.edu.co (F.B.C.)

<sup>2</sup> Grupo de Investigación Bioprocesos y Flujos Reactivos, Department of Processes and Energy, Faculty of Mines, National University of Colombia, Medellín 050034, Colombia; amolinao@unal.edu.co (A. M.).

<sup>3</sup> Universidad Tecnológica Nacional (UTN), Facultad Regional Haedo, Haedo, Buenos Aires E 1706, Argentina; betianalerner@gmail.com (B.L.); max@fullgen.com.ar (M.S.P.)

<sup>4</sup> Department of Electrical and Computer Engineering, Florida International University, Miami, Florida 33174, USA; betianalerner@gmail.com (B.L.); max@fullgen.com.ar (M.S.P.)

\* Correspondence: e-mail@e-mail.com; Tel.: (optional; include country code; if there are multiple corresponding authors, add author initials)

## S1. Meshing of the geometries

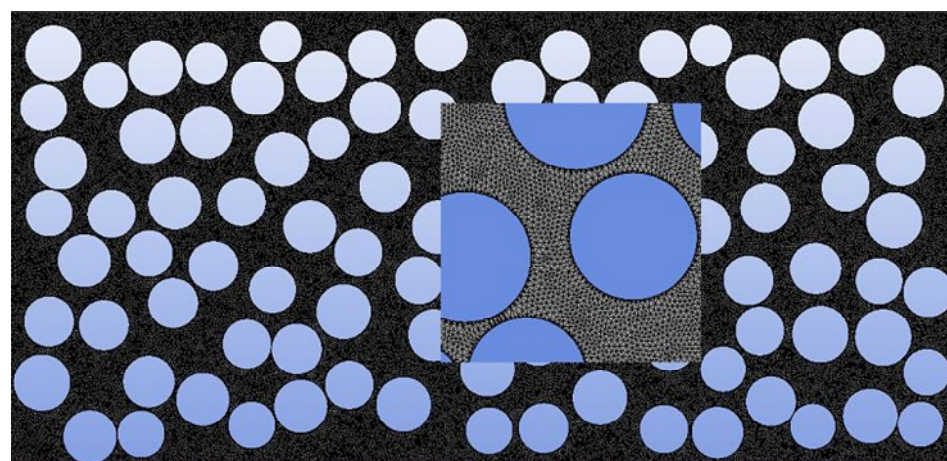

**Figure S1.** Detail of the mesh for micromodel (a)

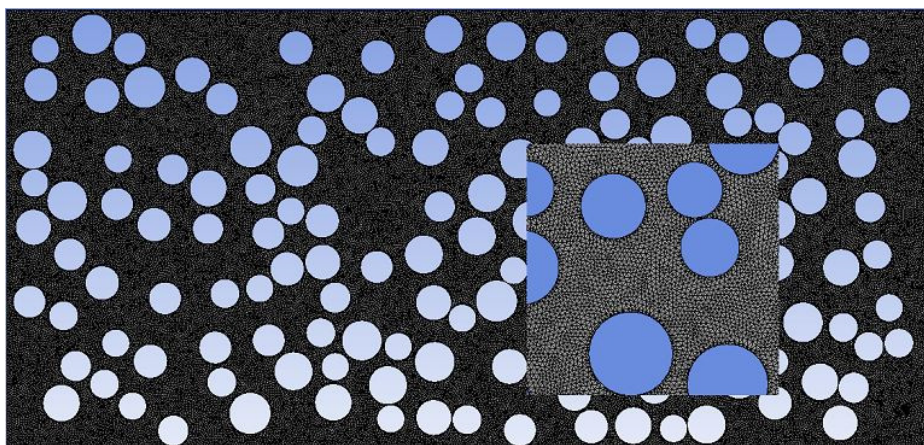

**Figure S2.** Detail of the mesh for micromodel (b).

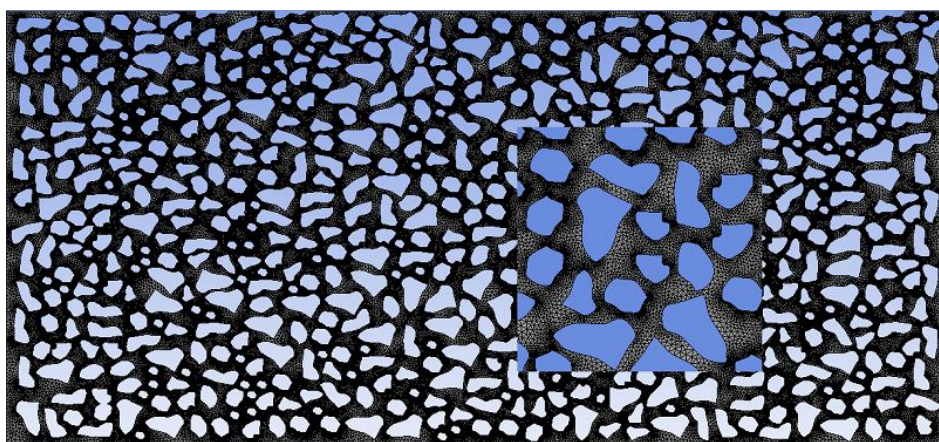

**Figure S3.** Detail of the mesh for micromodel (c)

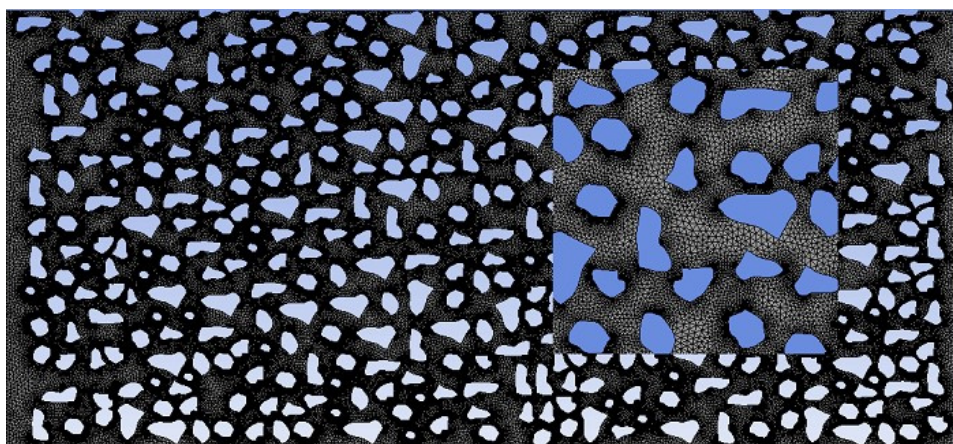

**Figure S4.** Detail of the mesh for micromodel (d)



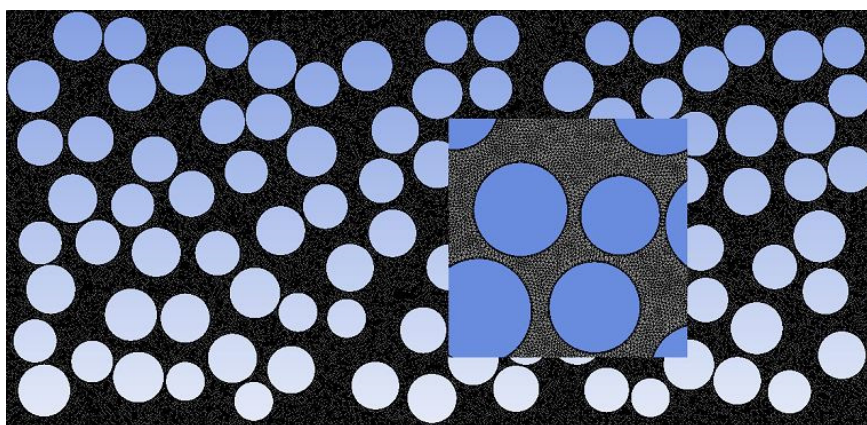

**Figure S5.** Detail of the mesh for micromodel (e)

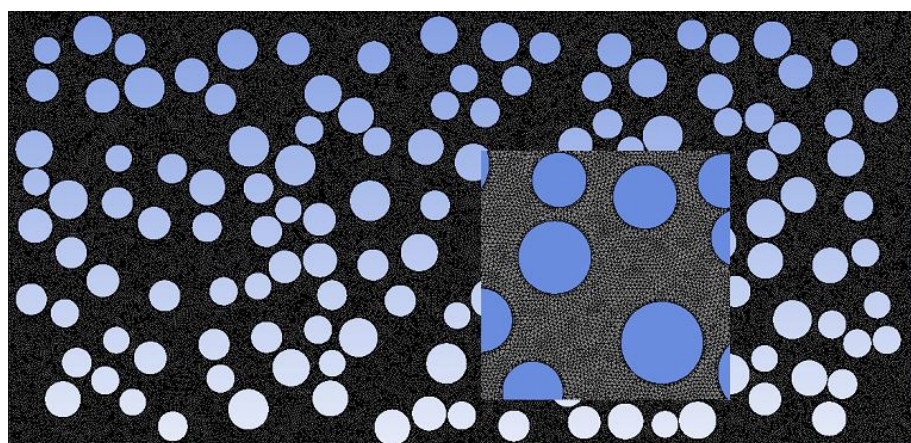

**Figure S6.** Detail of the mesh for micromodel (f)

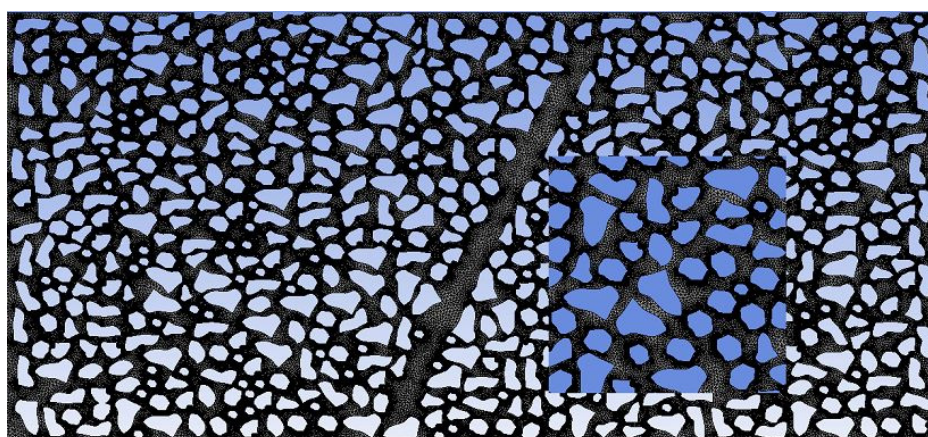

**Figure S7.** Detail of the mesh for micromodel (g)

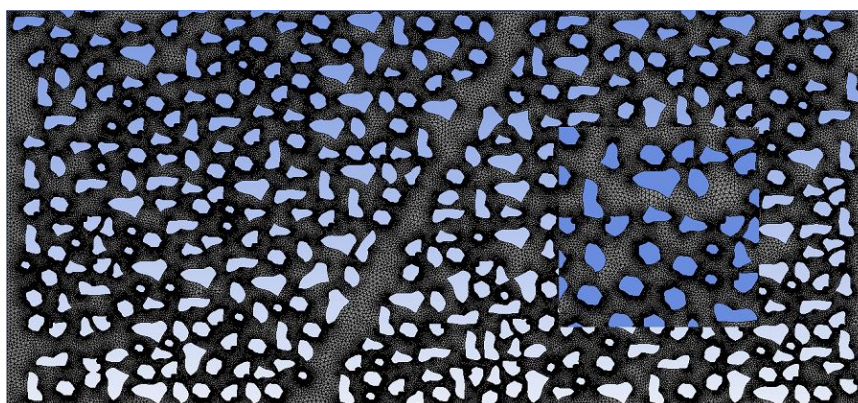

**Figure S8.** Detail of the mesh for micromodel (h)

## S2. Parameters of the variable time step algorithm

A variable-time-step algorithm was used in all simulations with a global Courant number of 2. Table S1 presents the parameters used for the variable-time-step algorithm.

**Table S1.** Parameters for the variable time-step algorithm used in the simulations.

| Parameter                  | Value  |
|----------------------------|--------|
| Minimum Time Step Size (s) | 0.0001 |
| Maximum Time Step Size (s) | 10     |
| Minimum Step change factor | 0.8    |
| Maximum Step change factor | 1.2    |
| Initial Time Step size (s) | 0.1    |

## S3. Fractal dimension of the flow pattern

The fractal dimension of the flow pattern at the breakthrough time was computed based on image analysis and the fractal box-counting method [1], where a series of boxes of decreasing size are systematically laid over the flow pattern, and the number of these elements ( $N$ ) in each sequence is determined. The fractal dimension is obtained from the slope of the line of the plot of the logarithm of  $N$  and the logarithm of the inverse of the box size ( $r$ ) as described by Equation S1.

$$D = \frac{\log(N)}{\log(r)} \quad (\text{S1})$$

where  $D$  is the fractal dimension of the analyzed pattern.

## S4. Phase behavior

Phase behavior and its modeling are also considered in this research. Figure S9 represents the phase behavior between crude oil and surfactant solution.

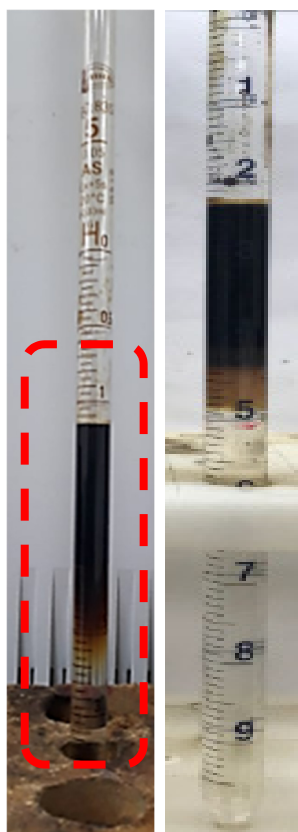

**Figure S9.** Phase behavior between crude oil and surfactant solution.

As can be seen in Figure s.9, there is a type III Winsor behavior between the phases, where a petroleum microemulsion is formed in a separate phase between the petroleum and water phases. In this case, the system comprises a surfactant solution displacing microemulsion, which displaces oil [2,3]. Despite the knowledge of the behavior of phases, in the modeling, the implication of considering two phases mobilizing through the micro-model is carried out, this is done in order to simplify the mathematical model, where the basis of additional research carried out with similar phenomenology was taken [4-7].

#### S4. Extensive Selection Flowchart



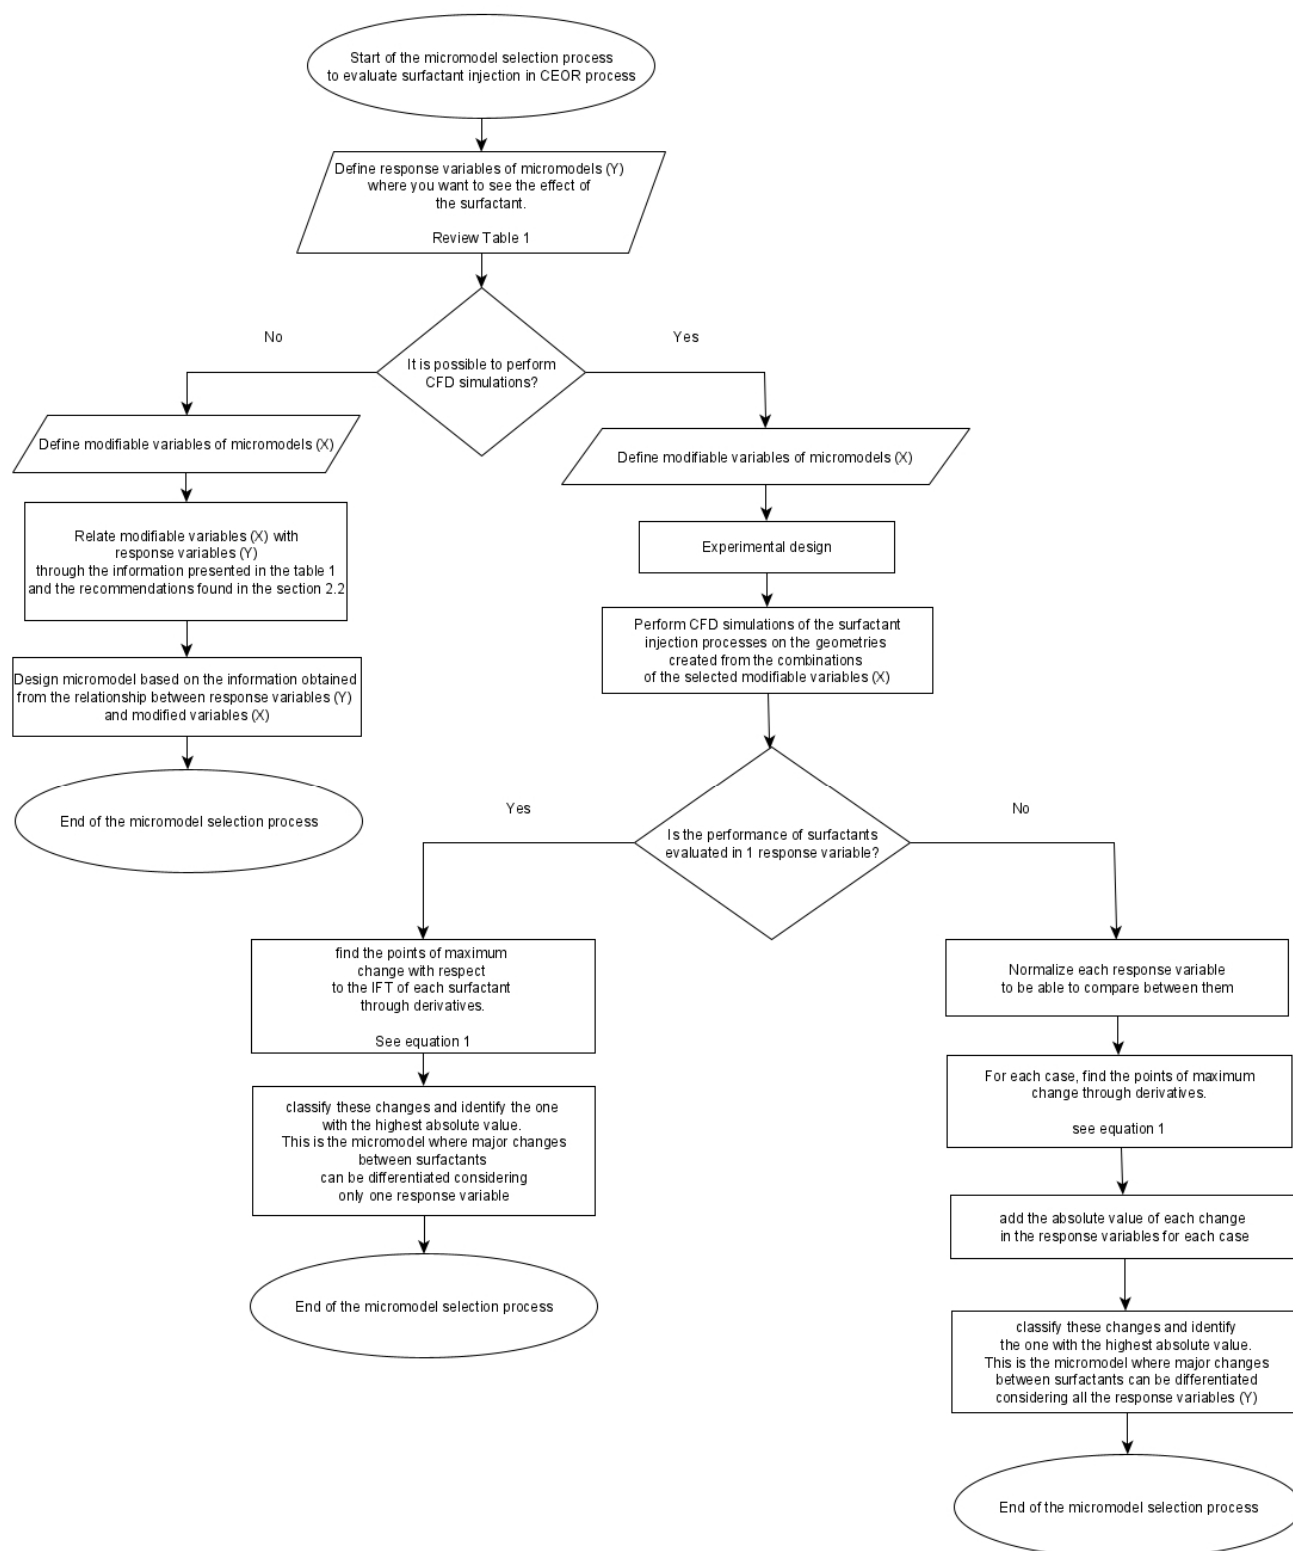

**Figure S10.** Extensive Selection Flowchart for micromodel experiments.

## References

1. Falconer, K. *Fractal geometry: mathematical foundations and applications*; John Wiley & Sons: 2004.
2. Alzahid, Y.A.; Mostaghimi, P.; Walsh, S.D.; Armstrong, R.T. Flow regimes during surfactant flooding: The influence of phase behaviour. *Fuel* **2019**, *236*, 851–860.
3. Kegel, W.; Lekkerkerker, H. Phase behaviour of an ionic microemulsion system as a function of the cosurfactant chain length. *Colloids and Surfaces A: Physicochemical and Engineering Aspects* **1993**, *76*, 241–248.
4. Rostami, P.; Sharifi, M.; Aminshahidy, B.; Fahimpour, J. The effect of nanoparticles on wettability alteration for enhanced oil recovery: micromodel experimental studies and CFD simulation. *Petroleum Science* **2019**, *16*, 859–873.
5. Gharibshahi, R.; Jafari, A.; Ahmadi, H. CFD investigation of enhanced extra-heavy oil recovery using metallic nanoparticles/steam injection in a micromodel with random pore distribution. *Journal of Petroleum Science and Engineering* **2019**, *174*, 374–383, doi:doi.org/10.1016/j.petrol.2018.10.051.
6. Ghanad Dezfally, M.; Jafari, A.; Gharibshahi, R. CFD simulation of enhanced oil recovery using nanosilica/supercritical CO<sub>2</sub>. *Advanced Materials Research* **2015**, *1104*, 81–86, doi:doi.org/10.4028/[www.scientific.net/AMR.1104.81](http://www.scientific.net/AMR.1104.81).
7. Gharibshahi, R.; Jafari, A.; Haghtalab, A.; Karambeigi, M.S. Application of CFD to evaluate the pore morphology effect on nanofluid flooding for enhanced oil recovery. *RSC Advances* **2015**, *5*, 28938–28949.
